# Supplementary material for: Global Nitrogen and Sulfur Budgets Using a Measurement-Model Fusion Approach
Source: Copernicus journal article supplement (doi:10.5194/egusphere-2022-873), 2022-09-20
Supplement: Supplementary file 1 [file egusphere-2022-873-supplement.pdf]

1 *Supplementary Information for*

2  
3 **Global Nitrogen and Sulfur Budgets Using a Measurement-Model**  
4 **Fusion Approach**

5 **Hannah J. Rubin<sup>1</sup>, Joshua S. Fu<sup>1,2</sup>, Frank Dentener<sup>3</sup>, Rui Li<sup>4</sup>, Kan Huang<sup>5</sup>, Hongbo Fu<sup>5</sup>**

6 <sup>1</sup>Department of Civil and Environmental Engineering, University of Tennessee, Knoxville, TN, 37996, USA

7 <sup>2</sup>Computational Earth Science Group, Oak Ridge National Laboratory, Oak Ridge, TN 37831, USA

8 <sup>3</sup>European Commission, Joint Research Centre, Ispra, Italy

9 <sup>4</sup>Ministry of Education Key Laboratory for Earth System Modeling, Department of Earth System Science, Tsinghua  
10 University, Beijing, 100084, China

11 <sup>5</sup>Shanghai Key Laboratory of Atmospheric Particle Pollution and Prevention (LAP3), Department of Environmental Science  
12 and Engineering, Fudan University, Shanghai, 200433, China

13  
14 E-mail: [jsfu@utk.edu](mailto:jsfu@utk.edu)

15  
16  
17 **Contents of this file**

18  
19 Figure S1  
20  
21  
22

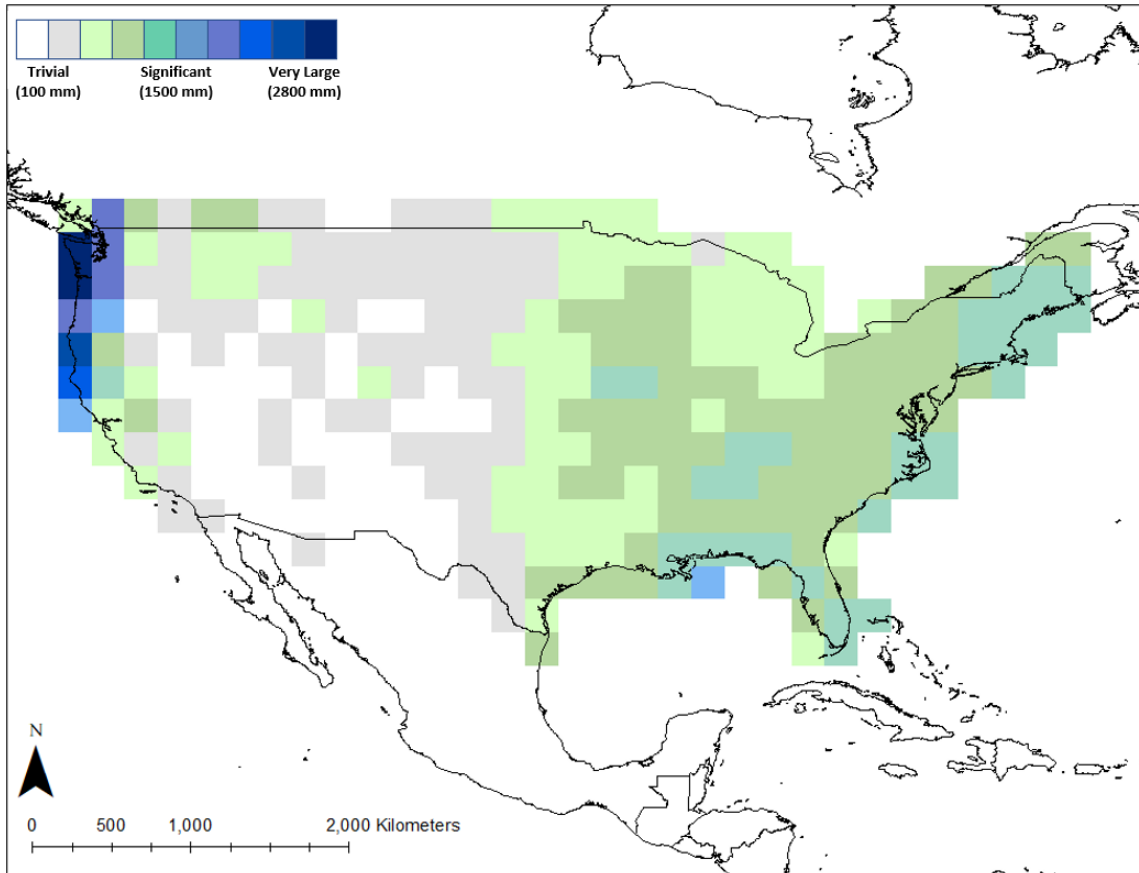

**Figure S1.** The difference between aggregated PRISM precipitation (1.9x1.9 degree) and modeled CAM-chem precipitation (1.9x1.9 degree) over the US in 2010. The greatest differences are in coastal areas.
